# Supplementary material
Source: PubMed Central journal article supplement (PMC4578245)
Supplement: NIHMS63504-supplement-01.pdf [file NIHMS63504-supplement-01.pdf]

| Allergen-families (n=50)                        | Allergens (n=85)   | Route of exposure | 1997/2007 * |
|-------------------------------------------------|--------------------|-------------------|-------------|
| Acidic glycoprotein                             | Alt a 1            |                   | 1/1         |
| Mitogillin family                               | Asp f 1            |                   | 0/0         |
| Mannitol dehydrogenase                          | Cla h 8            |                   | 0/0         |
| PR-10                                           | Api g 1            |                   | 1/1         |
|                                                 | Act d 8            |                   | 1/0         |
|                                                 | Aln g 1            |                   | 7/9         |
|                                                 | Bet v 1            |                   | 7/9         |
|                                                 | Cor a 1            |                   | 6/8         |
|                                                 | Dau c 1            |                   | 0/0         |
|                                                 | Mal d 1            |                   | 7/8         |
| Profilin                                        | Bet v 2            |                   | 3/5         |
|                                                 | Cyn d 12           |                   | 4/3         |
|                                                 | Hel a 2            |                   | 3/3         |
|                                                 | Hev b 8            |                   | 5/5         |
|                                                 | Mer a 1            |                   | 5/5         |
|                                                 | Ole e 2            |                   | 5/4         |
|                                                 | Par j 3            |                   | 2/2         |
|                                                 | Phl p 12           |                   | 3/2         |
|                                                 | Pho d 2            |                   | 3/4         |
|                                                 | Pectate-lyase      | Cup a 1           |             |
| Ole e 1-related protein                         | Pla a 1            |                   | 0/0         |
| Polygalacturonase                               | Pla a 2            |                   | 2/1         |
| Common olive group 1                            | Ole e 1            |                   | 5/6         |
| Group 1 grass pollen allergens                  | Lol p 1            |                   | 10/11       |
|                                                 | Phl p 1            |                   | 9/11        |
| Group 2/3 grass pollen allergens                | Phl p 2            |                   | 7/8         |
| Group 5/6 grass pollen allergens                | Phl p 5            |                   | 9/9         |
|                                                 | Phl p 6            |                   | 8/8         |
| Ca-binding 2-EF-hand protein                    | Phl p 7            |                   | 3/3         |
| Barley, Alpha amylase/Beta amylase              | Hor v 16           |                   | 0/0         |
|                                                 | Hor v 17           |                   | 0/0         |
| Class A pollen coat protein                     | Art v 1            |                   | 4/3         |
| Rubber elongation factor                        | Hev b 1            |                   | 0/0         |
|                                                 | Hev b 3            |                   | 0/0         |
| Acidic protein                                  | Hev b 5            |                   | 0/0         |
| Hevein-like domain                              | Hev b 6            |                   | 1/0         |
|                                                 | Hev b 11           |                   | 0/0         |
|                                                 | Tri a 18           |                   | 0/0         |
| Patatin                                         | Hev b 7            |                   | 0/0         |
| Enolase                                         | Alt a 6<br>Hev b 9 |                   | 0/0<br>0/0  |
| Fe/Mn superoxide dismutase                      | Hev b 10           |                   | 0/0         |
| Papain-like cysteine protease                   | Act d 1            |                   | 0/0         |
| Thaumatococcus-like protein                     | Act d 2            |                   | 0/1         |
| Expansin N-terminal domain                      | Act d 5            |                   | 0/0         |
| Plant invertase/Pectin methylesterase inhibitor | Act d 6            |                   | 1/0         |
| Pectin methylesterase                           | Act d 7            |                   | 0/0         |
| Prolamin/Seed storage protein                   | Tri a gliadin      |                   | 0/0         |
| nsLTP - food                                    | Cor a 8            |                   | 0/0         |
|                                                 | Pru p 3            |                   | 1/0         |
| nsLTP - pollen                                  | Par j 1            |                   | 0/0         |
|                                                 | Par j 2            |                   | 1/0         |
| Legumin-like protein                            | Ana o 2            |                   | 0/0         |
| CCD marker                                      | Ana c 2            |                   | 0/0         |
| Ovomucoid                                       | Gal d 1            |                   | 0/0         |
| Ovalbumin                                       | Gal d 2            |                   | 0/0         |
| Ovotransferrin (Conalbumin)                     | Gal d 3            |                   | 0/0         |
| C-type lysozyme/alpha-lactalbumin family        | Bos d 4            |                   | 0/0         |
|                                                 | Gal d 4            |                   | 4/0         |
| Beta-lactoglobulin                              | Bos d 5            |                   | 0/0         |
| Serum albumin                                   | Bos d 6            |                   | 2/0         |
|                                                 | Can f 3            |                   | 1/1         |
|                                                 | Gal d 5            |                   | 0/0         |
| Immunoglobulins                                 | Bos d 7            |                   | 0/0         |
| Casein                                          | Bos d 8            |                   | 0/1         |
| Transferrin                                     | Bos d Lactoferrin  |                   | 2/0         |
| Lipocalin                                       | Can f 1            |                   | 2/3         |
| Fel d 1 family                                  | Fel d 1            |                   | 7/5         |
| Group 1 mite allergens                          | Der f 1            |                   | 0/0         |
|                                                 | Der p 1            |                   | 1/0         |
|                                                 | Der s 1            |                   | 0/0         |
| Group 2 mite allergens                          | Der f 2            |                   | 5/5         |
|                                                 | Der p 2            |                   | 5/5         |
| Tropomyosin                                     | Ani s 3            |                   | 0/0         |
|                                                 | Der p 10           |                   | 0/0         |
|                                                 | Hel as 1           |                   | 0/0         |
|                                                 | Pen i 1            |                   | 0/0         |
|                                                 | Pen m 1            |                   | 0/0         |
|                                                 | Per a 7            |                   | 0/0         |
| Aspartic protease                               | Bla g 2            |                   | 0/0         |
| Glutathione S-transferase                       | Bla g 5            |                   | 0/0         |
| Phospholipase A2                                | Api m 1            |                   | 1/0         |
| Melittin                                        | Api m 4            |                   | 7/0         |
| Serine protease inhibitor                       | Ani s 1            |                   | 0/0         |
| <b>Positive: n=25</b>                           | <b>n=42</b>        |                   |             |

\* Number of individuals with IgE reactivity in 1997/2007

**FIG E1.** Families of tested allergens and summary of reactivities. Allergens belonging to the same cross-reactive allergen family (left column) were grouped in individual boxes (route of exposure: green, Airborne allergens; orange, food allergens; and yellow, venom allergens). The right column displays the numbers of positive sera in 1997 and 2007. Total numbers of allergen families and allergens recognized in 1997, 2007, or both are shown (bottom line, purple boxes). nsLTP, Nonspecific lipid transfer protein; PR-10, pathogenesis-related protein family 10.

| Individual | Sex | Year of birth | Allergies    | Symptoms     | Immunotherapy    | Symptomatic therapy |
|------------|-----|---------------|--------------|--------------|------------------|---------------------|
| A1         | m   | 1949          | t,g          | r            | Yes (1975)       | ah, nc              |
| A2         | m   | 1953          | t,g,w,mi,a,f | r, c, d, oas | No               | ah                  |
| A3         | m   | 1962          | t            | r,c, oas     | No               | -                   |
| A4         | f   | 1949          | t,g          | r            | Yes (1980-1985)  | ah                  |
| A5         | m   | 1970          | t,g          | r,as,d       | No               | ah, tc              |
| A6         | f   | 1970          | t,g,mi,a     | r,c          | No               | ah                  |
| A7         | f   | 1967          | t            | r,c,as       | No               | ah                  |
| A8         | f   | 1949          | t,g, f       | r,as, oas    | Yes (1980)       | ah                  |
| A9         | m   | 1961          | g            | r,c          | Yes (1975)       | ah                  |
| A10        | f   | 1953          | t, g, f      | r, c         | Yes (1983, 1987) | ah, nc              |
| A11        | f   | 1963          | t,g          | r,c,as       | No               | ah                  |
| A12        | m   | 1962          | t, g, f      | r, c         | No               | ah                  |
| N1         | f   | 1967          | -            | -            | -                | -                   |
| N2         | f   | 1964          | -            | -            | -                | -                   |
| N3         | f   | 1967          | -            | -            | -                | -                   |
| N4         | f   | 1971          | -            | -            | -                | -                   |
| N5         | f   | 1969          | -            | -            | -                | -                   |
| N6         | f   | 1968          | -            | -            | -                | -                   |
| N7         | m   | 1970          | -            | -            | -                | -                   |
| N8         | f   | 1964          | -            | -            | -                | -                   |
| N9         | f   | 1947          | -            | -            | -                | -                   |
| N10        | m   | 1963          | -            | -            | -                | -                   |

**FIG E2.** Demographic and clinical characterization of allergic patients (A1-12) and nonallergic subjects (N1-N10). *f*, Female; *m*, male. Allergies: *a*, animals; *f*, food; *g*, grass pollen; *mi*, mites; *t*, tree pollen; *w*, weed pollen. Symptoms: *as*, asthma; *c*, conjunctivitis; *d*, dermatitis; *oas*, oral allergy syndrome; *r*, rhinitis. Symptomatic therapy: *ah*, antihistamine; *nc*, nasal corticosteroid; *tc*, topical (dermal) corticosteroid. *Dashes* indicate lack of allergy, symptoms, or therapy.

| Individual | Reactive with allergen-families (allergens) |         |                          |         | Allergen-family (allergen molecule)                                                                   |                                                                            |                                                                                                                                                                                                                                            |                                                                                        |
|------------|---------------------------------------------|---------|--------------------------|---------|-------------------------------------------------------------------------------------------------------|----------------------------------------------------------------------------|--------------------------------------------------------------------------------------------------------------------------------------------------------------------------------------------------------------------------------------------|----------------------------------------------------------------------------------------|
|            | 1997                                        | 2007    | Difference 2007 vs. 1997 |         | Acquired IgE-reactivities                                                                             |                                                                            | Lost IgE-reactivities                                                                                                                                                                                                                      |                                                                                        |
|            |                                             |         | +                        | -       | Genuinely new IgE-reactivity                                                                          | New IgE-reactivity but pre-existing reactivity to cross-reactive allergens | Loss of detectable IgE-reactivity                                                                                                                                                                                                          | Loss of detectable IgE-reactivity but remaining reactivity to cross-reactive allergens |
| A1         | 9 (23)                                      | 7 (20)  | 0                        | -2 (-3) |                                                                                                       |                                                                            | C-type lysozyme (Gal d 4)<br>Melittin (Api m 4)                                                                                                                                                                                            | PR10 (Act d 8)                                                                         |
| A2         | 15 (22)                                     | 8 (14)  | +1 (+1)                  | -8 (-9) | Caseins (Bos d 8)                                                                                     |                                                                            | Serum albumins (Bos d 6)<br>C-type lysozyme (Gal d 4)<br>Transferrins (Bos d Lactoferrin)<br>Melittin (Api m 4)<br>Papain-like Cys-proteases (Der p 1)<br>Barwin-family (Hev b 6.02)<br>nsLTP - pollen (Par j 2)<br>nsLTP - food (Pru p 3) | PR10 (Api g 1)                                                                         |
| A3         | 8 (8)                                       | 4 (9)   | +1 (+6)                  | -5 (-5) | PR10 (AIn g 1, Api g 1, Bet v 1, Cor a 1, Mal d 1)                                                    | Group 1 grass pollen allergens (Phl p 1)                                   | C-type lysozyme (Gal d 4)<br>Transferrins (Bos d Lactoferrin)<br>Phospholipase A2 (Api m 1)<br>Melittin (Api m 4)<br>Plant invertase (Act d 6)                                                                                             |                                                                                        |
| A4         | 5 (12)                                      | 3 (9)   | 0 (+1)                   | -2 (-4) |                                                                                                       | Profilins (Pho d 2)                                                        | C-type lysozyme (Gal d 4)<br>Melittin (Api m 4)                                                                                                                                                                                            | Profilins (Cyn d 12, Par j 3)                                                          |
| A5         | 12 (20)                                     | 12 (20) | +1 (+3)                  | -1 (-3) | Thaumatococcal prot. (Act d 2)                                                                        | PR10 (Cor a 1)<br>Profilins (Bet v 2)                                      | Melittin (Api m 4)                                                                                                                                                                                                                         | Profilins (Ole e 2, Phl p 12)                                                          |
| A6         | 7 (15)                                      | 6 (15)  | 0 (+1)                   | -1 (-1) |                                                                                                       | Profilins (Bet v 2)                                                        | Class A pollen coat prot. (Art v 1)                                                                                                                                                                                                        |                                                                                        |
| A7         | 1 (1)                                       | 2 (3)   | +1 (+2)                  | 0 (0)   | Group 1 grass pollen allergens (Lol p 1, Phl p 1)<br>PR10 (AIn g 1, Bet v 1)                          |                                                                            |                                                                                                                                                                                                                                            |                                                                                        |
| A8         | 5 (8)                                       | 8 (11)  | +3 (+4)                  | 0 (-1)  | Ole e 1-related prot. (Ole e 1)<br>Group 2/3 grass pollen allergens (Phl p 2)<br>Lipocalins (Can f 1) |                                                                            |                                                                                                                                                                                                                                            | Serum albumins (Bos d 6)                                                               |
| A9         | 9 (19)                                      | 9 (20)  | +1 (+2)                  | -1 (-1) |                                                                                                       | Profilins (Par j 3)                                                        | Polygalacturonases (Pla a 2)                                                                                                                                                                                                               |                                                                                        |
| A10        | 6 (11)                                      | 5 (11)  | 0 (0)                    | -1 (-1) |                                                                                                       |                                                                            | Melittin (Api m 4)                                                                                                                                                                                                                         |                                                                                        |
| A11        | 7 (12)                                      | 4 (9)   | 0 (0)                    | -3 (-3) |                                                                                                       |                                                                            | Fel d 1-family (Fel d 1)<br>C-type lysozyme (Gal d 4)<br>Melittin (Api m 4)                                                                                                                                                                |                                                                                        |
| A12        | 4 (10)                                      | 4 (10)  | 0 (0)                    | 0 (0)   |                                                                                                       |                                                                            |                                                                                                                                                                                                                                            |                                                                                        |
| N1         | 0 (0)                                       | 1 (1)   | +1 (+1)                  | 0 (0)   | Fel d 1-family (Fel d 1)                                                                              |                                                                            |                                                                                                                                                                                                                                            |                                                                                        |
| N2         | 0                                           | 0       | 0                        | 0       |                                                                                                       |                                                                            |                                                                                                                                                                                                                                            |                                                                                        |
| N3         | 0                                           | 0       | 0                        | 0       |                                                                                                       |                                                                            |                                                                                                                                                                                                                                            |                                                                                        |
| N4         | 0                                           | 0       | 0                        | 0       |                                                                                                       |                                                                            |                                                                                                                                                                                                                                            |                                                                                        |
| N5         | 0                                           | 0       | 0                        | 0       |                                                                                                       |                                                                            |                                                                                                                                                                                                                                            |                                                                                        |
| N6         | 0                                           | 0       | 0                        | 0       |                                                                                                       |                                                                            |                                                                                                                                                                                                                                            |                                                                                        |
| N7         | 0                                           | 0       | 0                        | 0       |                                                                                                       |                                                                            |                                                                                                                                                                                                                                            |                                                                                        |
| N8         | 0                                           | 0       | 0                        | 0       |                                                                                                       |                                                                            |                                                                                                                                                                                                                                            |                                                                                        |
| N9         | 0                                           | 0       | 0                        | 0       |                                                                                                       |                                                                            |                                                                                                                                                                                                                                            |                                                                                        |
| N10        | 0                                           | 0       | 0                        | 0       |                                                                                                       |                                                                            |                                                                                                                                                                                                                                            |                                                                                        |

**FIG E3.** Detailed analysis of IgE reactivities and their changes for each subject. Numbers of recognized allergen molecules and allergen families in 1997 and 2007, as well as changes in 2007 versus 1997, are shown. Allergens that were negative by means of chip but positive by means of CAP in 1997 are printed in red. PR10, Pathogenesis-related protein family 10.

| Patient | CAP      | kUA/l |
|---------|----------|-------|
| A2      | nBos d 8 | 1.53  |
| A3      | rBet v 1 | 0.05  |
| A7      | rPhl p 1 | 0.49  |
| A8      | rBet v 1 | 1.06  |
|         | nOle e 1 | 1.72  |
|         | rPhl p 2 | 1.44  |
| A9      | rCan f 1 | 1.49  |
| N1      | rFel d 1 | 0.15  |

**FIG E4.** Results of CAP measurements for sera that were negative to certain allergens in ISAC in 1997 but positive in 2007. *kUA/l*, Kilounits of antigen-specific IgE per liter.
